# Supplementary material for: Is It Easy to Be Urban? Convergent Success in Urban Habitats among Lineages of a Widespread Native Ant
Source: PLoS One. 2010 Feb 12;5(2):e9194. doi: 10.1371/journal.pone.0009194 (PMC2820551; doi:10.1371/journal.pone.0009194)
Supplement: Appendix S1 — List of all colonies used in the study, including the number of workers sequenced, Haplotype, Genbank accession number, and museum where physical specimens are deposited. (0.03 MB XLS) [file pone.0009194.s001.xls]

## Sheet: Localities
Sample	State	Elevation (m)	Lat	Lon	Habitat	Colony	Clade	Haplotype	# individuals sequenced per nest	% sequence divergence within nest	Specimen #	Genbank #	Specimen Deposition	Museum #
1	OR	188	44.941	123.101	Urban		West	Ts1	1		SBM51	GU373531	Bohart Museum of Entomology at University of California-Davis	CASENT 0197500
2	OR	139	43.2043	123.355	Urban		West	Ts1	1		SBM52	GU373531	Bohart Museum of Entomology at University of California-Davis	CASENT 0197501
3	WA	260	47.017	120.001	Natural		West	Ts2	2	0	JTL5710	GU373532	John Longino Personal Collection
4	CA	640	38.8667	122.417	Natural		West	Ts3	2	0	PSW14822-5	GU373533	Bohart Museum of Entomology at University of California-Davis
5	UT	2377.44	38.7007	111.937	Natural		Mountain	Ts4	1		SPC7707	GU373534	Museum of Comparative Zoology at Harvard University
6	UT	2855.98	38.6462	111.951	Natural	Polygynous	Mountain	Ts5	1		SPC7779	GU373535	Museum of Comparative Zoology at Harvard University
7	UT	2849.88	38.6485	111.95	Natural		Mountain	Ts6	1		SPC7815	GU373536	Museum of Comparative Zoology at Harvard University
8	UT	2852.93	38.6352	111.948	Natural		Mountain	Ts6	1		SPC7783	GU373536	Museum of Comparative Zoology at Harvard University
9	UT	2865.12	38.6488	111.95	Natural	Polygynous	Mountain	Ts7	1		SPC7731	GU373537	Museum of Comparative Zoology at Harvard University
10	UT	2636.52	38.6628	111.941	Natural		Mountain	Ts8	1		SPC7726	GU373538	Museum of Comparative Zoology at Harvard University
11	CO	2499.36	38.4203	107.628	Natural		Mountain	Ts9	1		SPC7388	GU373539	Museum of Comparative Zoology at Harvard University
12	UT	2316.48	37.8693	109.388	Natural		Mountain	Ts10	1		SPC7332	GU373540	Museum of Comparative Zoology at Harvard University
13	CO	2910.84	39.062	108.112	Natural		Mountain	Ts11	1		SPC7266	GU373541	Museum of Comparative Zoology at Harvard University
14	CO	2920	38.9613	106.991	Natural	Polygynous	Mountain	Ts12	2	0	SBM53	GU373542	Bohart Museum of Entomology at University of California-Davis	CASENT 0197502
15	CO	2499.36	38.4203	107.628	Natural		Mountain	Ts13	1		SPC7393	GU373543	Museum of Comparative Zoology at Harvard University
16	AR	95	34.7914	92.2715	Urban		South	Ts14	2	0	SBM54	GU373544	Bohart Museum of Entomology at University of California-Davis	CASENT 0197503
17	DC	1	38.889	77.041	Urban		South	Ts15	1		SBM55	GU373545	Bohart Museum of Entomology at University of California-Davis	CASENT 0197504
18	TN	318	35.844	83.968	Urban	Polygynous	South	Ts16	2	0	SBM56	GU373546	Bohart Museum of Entomology at University of California-Davis	CASENT 0197505
19	NC	35	35.862	77.759	Urban	Polygynous	South	Ts17	4	0	SBM57	GU373547	Bohart Museum of Entomology at University of California-Davis	CASENT 0197506
20	NC	87	35.784	78.63	Urban	Monogynous	South	Ts18	2	0	SBM58	GU373548	Bohart Museum of Entomology at University of California-Davis	CASENT 0197507
21	AR	90	33.8126	94.2837	Natural		South	Ts19	1		SBM59	GU373549	Bohart Museum of Entomology at University of California-Davis	CASENT 0197508
22	TX	161	32.8865	96.742	Urban		South	Ts20	1		SBM60	GU373550	Bohart Museum of Entomology at University of California-Davis	CASENT 0197509
23	OK	350	35.1979	97.4521	Urban		South	Ts21	1		MEKOU 64559	GU373551	Bohart Museum of Entomology at University of California-Davis	CASENT 0197510
24	OK	345	35.1872	97.4318	Urban		South	Ts22	1		MEKOU 64556	GU373552	Bohart Museum of Entomology at University of California-Davis	CASENT 0197511
25	OK	356	35.2278	97.4571	Urban		South	Ts23	1		MEKOU 64557	GU373553	Bohart Museum of Entomology at University of California-Davis	CASENT 0197512
26	AL	210	33.413	86.8	Urban		South	Ts23	1		SBM61	GU373553	Bohart Museum of Entomology at University of California-Davis	CASENT 0197513
27	AR	90	33.8126	94.2837	Natural		South	Ts23	1		SBM62	GU373553	Bohart Museum of Entomology at University of California-Davis	CASENT 0197529
28	DC	61	38.9242	77.0417	Urban		North	Ts24	1		SPC7647	GU373554	Museum of Comparative Zoology at Harvard University
29	DE	37	39.682	75.778	Urban		North	Ts24	1		SBM64	GU373554	Bohart Museum of Entomology at University of California-Davis	CASENT 0197514
30	NC	33	35.86	77.761	Urban	Polygynous	North	Ts25	1		SBM65	GU373555	Bohart Museum of Entomology at University of California-Davis	CASENT 0197515
31	NC	66	35.94	78.581	Natural	Polygynous	North	Ts24	2	0	SBM66	GU373554	Bohart Museum of Entomology at University of California-Davis	CASENT 0197516
32	NC	87	35.784	78.63	Urban	Monogynous	North	Ts26	2	0	SBM67	GU373556	Bohart Museum of Entomology at University of California-Davis	CASENT 0197530
33	OH	184	41.654	83.55	Urban		North	Ts27	1		SBM68	GU373557	Bohart Museum of Entomology at University of California-Davis	CASENT 0197517
34	NB	358	40.817	96.702	Urban		North	Ts24	1		SBM69	GU373554	Bohart Museum of Entomology at University of California-Davis	CASENT 0197518
35	NC	55	35.8494	78.5301	Natural	Polygynous	North	Ts24	2	0	SBM70	GU373554	Bohart Museum of Entomology at University of California-Davis	CASENT 0197531
36	NC	118	35.7874	78.6736	Urban	Polygynous	North	Ts24	2	0	SBM71	GU373554	Bohart Museum of Entomology at University of California-Davis	CASENT 0197519
37	MD	106	39.533	76.309	Urban		North	Ts28	2	0	SBM72	GU373558	Bohart Museum of Entomology at University of California-Davis	CASENT 0197520
38	TN	548	35.599	83.7946	Natural	Polygynous	North	Ts29	2	0	SBM73	GU373559	Bohart Museum of Entomology at University of California-Davis	CASENT 0197532
39	TN	548	35.599	83.7946	Natural	Monogynous	North	Ts29	2	0	SBM74	GU373559	Bohart Museum of Entomology at University of California-Davis	CASENT 0197533
40	IN	187	40.424	86.915	Urban	Polygynous	North	Ts30	1		SBM75	GU373560	Bohart Museum of Entomology at University of California-Davis	CASENT 0197521
41	NC	65	35.9413	78.5778	Natural	Monogynous	North	Ts31	2	0	SBM76	GU373561	Bohart Museum of Entomology at University of California-Davis	CASENT 0197534
42	IL	220	40.109	88.223	Urban	Polygynous	North	Ts32	1		SBM77	GU373562	Bohart Museum of Entomology at University of California-Davis	CASENT 0197522
43	IN	202	40.4311	86.9381	Natural	Monogynous	North	Ts33	1		SBM78	GU373563	Bohart Museum of Entomology at University of California-Davis	CASENT 0197523
44	MA	33.528	41.804	70.675	Natural		North	Ts34	1		SPC7870	GU373564	Museum of Comparative Zoology at Harvard University
45	NC	1021.08	35.57	83.08	Natural		North	Ts35	1		SPC5586	GU373565	Museum of Comparative Zoology at Harvard University
46	VA	354	37.22	80.016	Urban		North	Ts36	1		SBM79	GU373566	Bohart Museum of Entomology at University of California-Davis	CASENT 0197524
47	ME	31	43.65	70.26	Urban		North	Ts37	1		SBM80	GU373567	Bohart Museum of Entomology at University of California-Davis	CASENT 0197525
48	TN	439	35.726	83.479	Urban	Polygynous	North	Ts38	2	0	SBM81	GU373568	Bohart Museum of Entomology at University of California-Davis	CASENT 0197526
49	MO	113	37.31	89.55	Urban		North	Ts39	1		SBM82	GU373569	Bohart Museum of Entomology at University of California-Davis	CASENT 0197527
T. erraticum	France	115	47.32	0.96	Natural		Outgroup		1		SBM83	GU388394	Bohart Museum of Entomology at University of California-Davis	CASENT 0197528
